# Supplementary material for: Engineered Protein Polymer-Gold Nanoparticle Hybrid Materials for Small Molecule Delivery
Source: PubMed Central journal article supplement (PMC4828936; doi:10.4172/2157-7439.1000356), 2016-02-29
Supplement: NIHMS769407-supplement-Supplementary_file.pdf [file NIHMS769407-supplement-Supplementary_file.pdf]

## Supporting Information

# Engineered Protein Polymer-Gold Nanoparticle Hybrid Materials for Small Molecule Delivery

Min Dai<sup>1#</sup>, Frezzo JA<sup>1#</sup>, Sharma E<sup>1</sup>, Chen R<sup>1</sup>, Singh N<sup>1</sup>, Yuvienco C<sup>1</sup>, Caglar E<sup>2</sup>, Xiao S<sup>2</sup>, Saxena A<sup>2</sup>, Montclare JK<sup>1,3,4\*</sup>

<sup>1</sup>Department of Chemical and Biomolecular Engineering, NYU Tandon School of Engineering, Brooklyn, New York 11201, USA

<sup>2</sup>Department of Biology, Brooklyn College and Graduate Center, City University of New York, Brooklyn, New York 11210, USA

<sup>3</sup>Department of Chemistry, New York University, New York, New York 10003, USA

<sup>4</sup>Department of Biochemistry, SUNY Downstate Medical Center, Brooklyn, New York 11203, USA

<sup>#</sup>These authors contributed equally

\*Corresponding author: Montclare JK, Department of Chemical and Biomolecular Engineering, NYU Tandon School of Engineering, Brooklyn, New York 11201, USA, Tel: 1-646-997-3679; E-mail: [montclare@nyu.edu](mailto:montclare@nyu.edu)

|                                       |                                                                                                               |
|---------------------------------------|---------------------------------------------------------------------------------------------------------------|
| <b>CE<sub>1</sub>-His<sub>6</sub></b> | MRGSHHHHHGSACELAAATATATATATAACGDLAPQMLRELQETNAALQDVRLLRQQVKEITFLKNTVMESDASGLQLLRQQVKEITFLKNTVMES              |
| <b>CE<sub>1</sub>-<u>IEGR</u></b>     | MRGSHHHHHHIEGR <del>EL</del> AATATATATATAACGDLAPQMLRELQETNAALQDVRLLRQQVKEITFLKNTVMESDASGLQLLRQQVKEITFLKNTVMES |
| <b>E<sub>1</sub>C-His<sub>6</sub></b> | MRGSHHHHHGSKPIAASAVPGVGPVGVPGFVPGVGPVGFVPGVEVPGVEVPLEGSELAATATATATATAACGDLAPQMLRELQETNAAL                     |
| <b>E<sub>1</sub>C-<u>IEGR</u></b>     | MRGSHHHHHHIEGR <del>IA</del> AASAVPGVGPVGVPGFVPGVGPVGFVPGVEVPGVEVPLEGSELAATATATATATAACGDLAPQMLRELQETNAAL      |
| <b>CE<sub>1</sub>-His<sub>6</sub></b> | DASGLQQATATATATATATAVDKPIAASAVPGVGPVGVPGFVPGVGPVGFVPGVEVPGVEVPLEGSGTGAKL                                      |
| <b>CE<sub>1</sub>-<u>IEGR</u></b>     | DASGLQQATATATATATATAVDKPIAASAVPGVGPVGVPGFVPGVGPVGFVPGVEVPGVEVPLEGSGTGAKL                                      |
| <b>E<sub>1</sub>C-His<sub>6</sub></b> | QDVRLLRQQVKEITFLKNTVMESDASGLQAATATATATATAVDLQPS                                                               |
| <b>E<sub>1</sub>C-<u>IEGR</u></b>     | QDVRLLRQQVKEITFLKNTVMESDASGLQAATATATATATAVDLQPS                                                               |

**Figure S1.** Alignment of protein sequences translated from DNAs that were verified by DNA sequencing at Eurofins. His tag cleavage site IEGR is highlighted with underline in CE<sub>1</sub>-IEGR and E<sub>1</sub>C-IEGR.

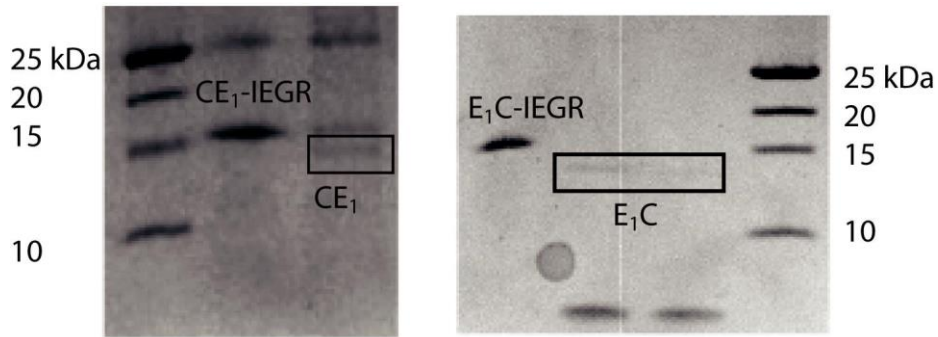

**Figure S2:** 12% SDS-PAGE verified cleavage of CE<sub>1</sub>-IEGR and E<sub>1</sub>C-IEGR on IEGR site by Factor Xa. Molecular weight of CE<sub>1</sub>-IEGR and E<sub>1</sub>C-IEGR are 14150.95 and 13950.75 Da respectively. After His tag and IEGR site removal, molecular weight of CE<sub>1</sub> and E<sub>1</sub>C are 12441.08 and 12240.88 Da respectively.

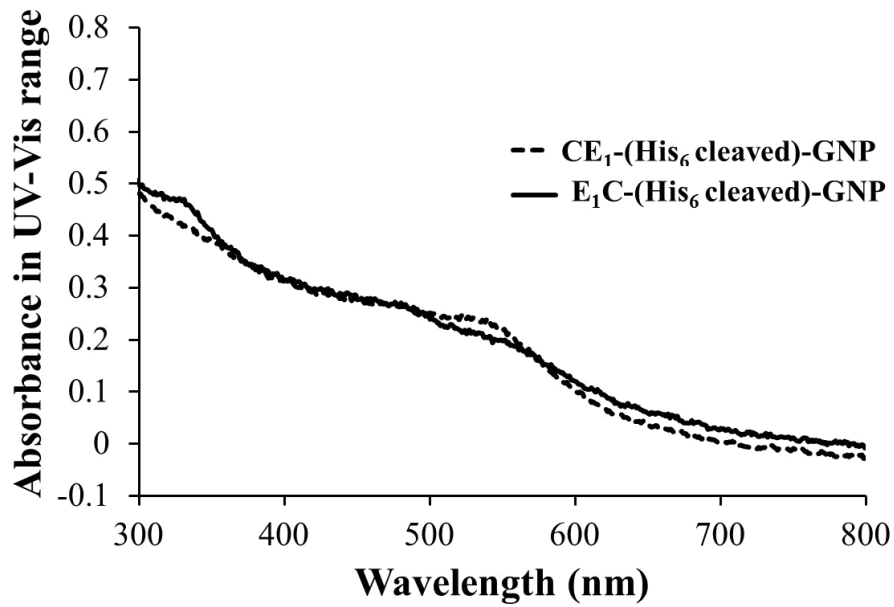

**Figure S3:** Wavelength spectra of CE<sub>1</sub>-His<sub>6</sub>-GNP (blue), E<sub>1</sub>C-His<sub>6</sub>-GNP (red), CE<sub>1</sub>-(His<sub>6</sub> cleaved)-GNP (green) and E<sub>1</sub>C-(His<sub>6</sub> cleaved)-GNP (purple). The spectra for phosphate buffer supplemented with Factor XA cleavage buffer and GNP was subtracted from each spectra.

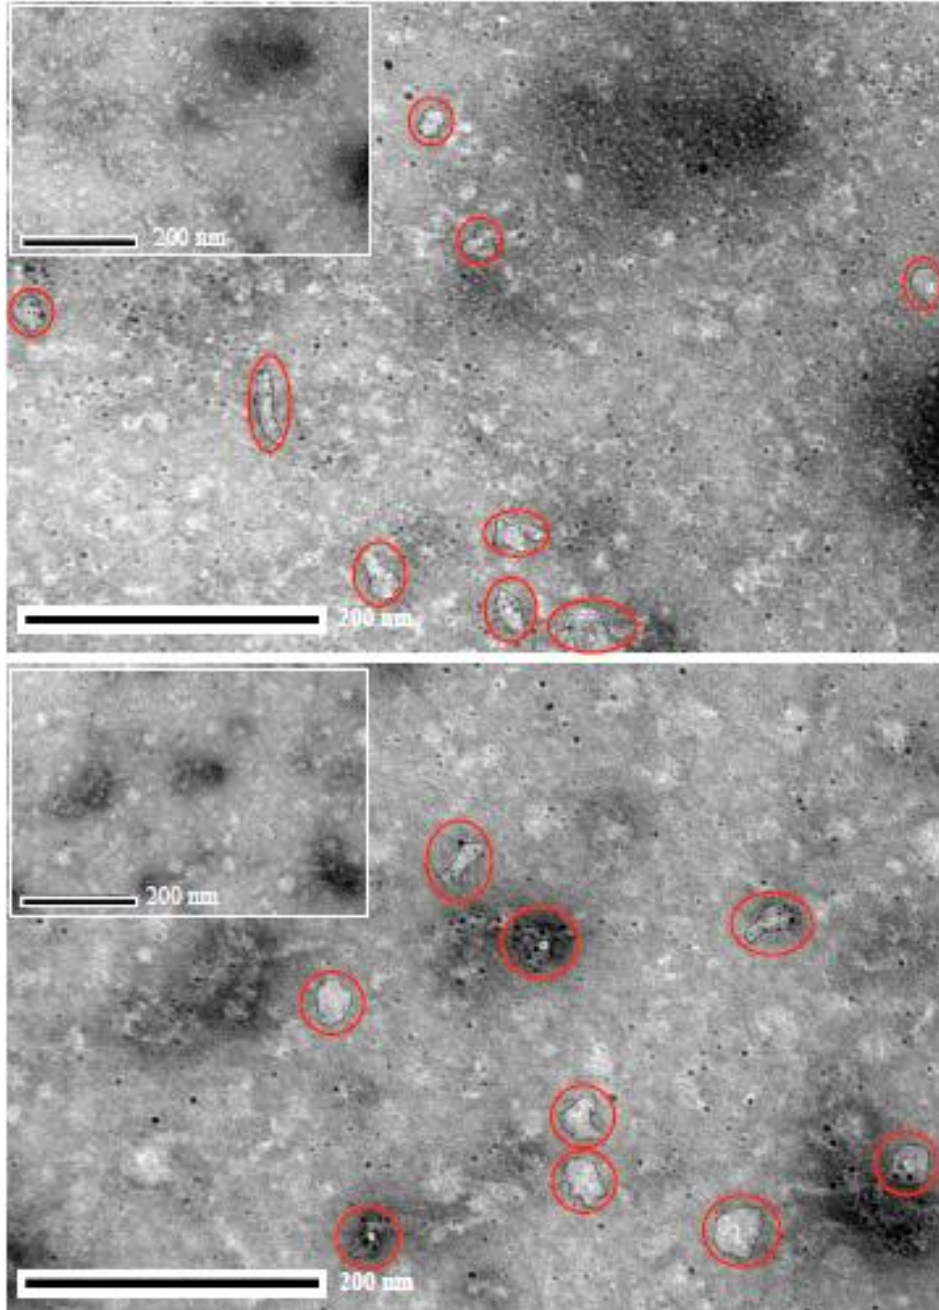

**Figure S4:** Protein size measurement. Micrographs of CE<sub>1</sub>-His<sub>6</sub>-GNP (top) and E<sub>1</sub>C-His<sub>6</sub>-GNP (bottom) with protein particles highlighted (with black circle). Selected protein particles are analyzed for size measurements using Image.

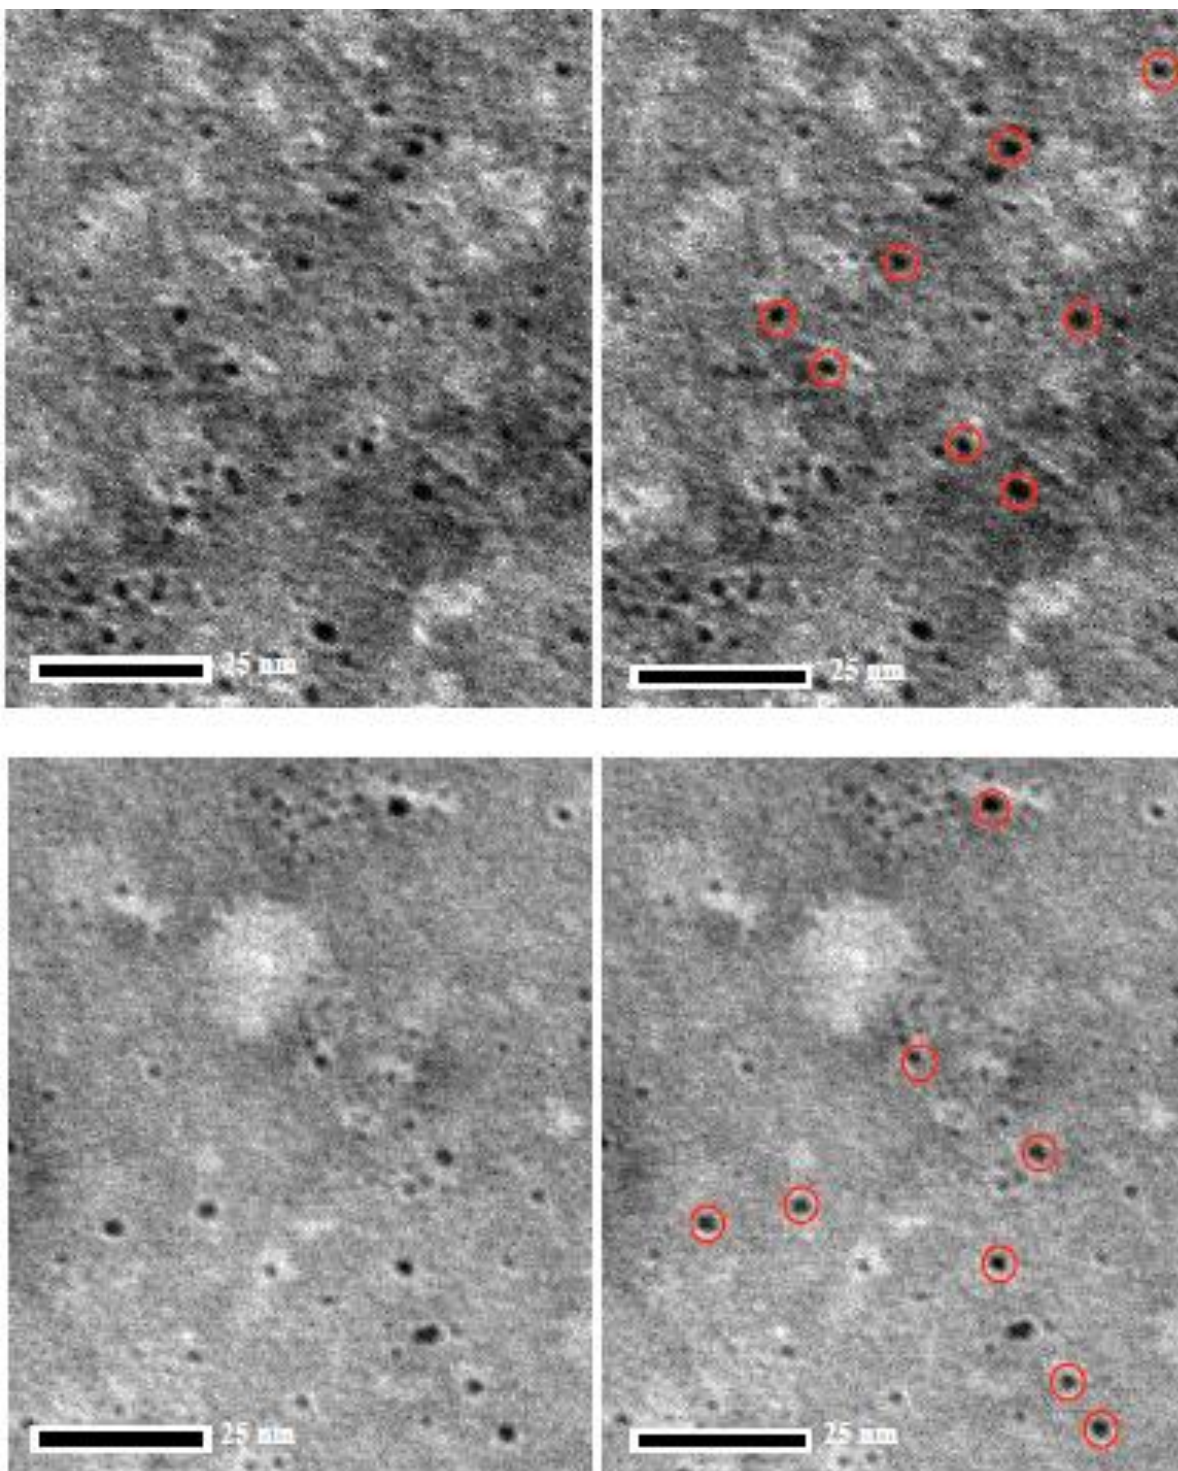

**Figure S5:** Micrographs of CE<sub>1</sub>-His<sub>6</sub>-GNP (upper panel) and E<sub>1</sub>C-His<sub>6</sub>-GNP (lower panel) samples with selected GNPs (with red circle, right side) for size measurements using Image.

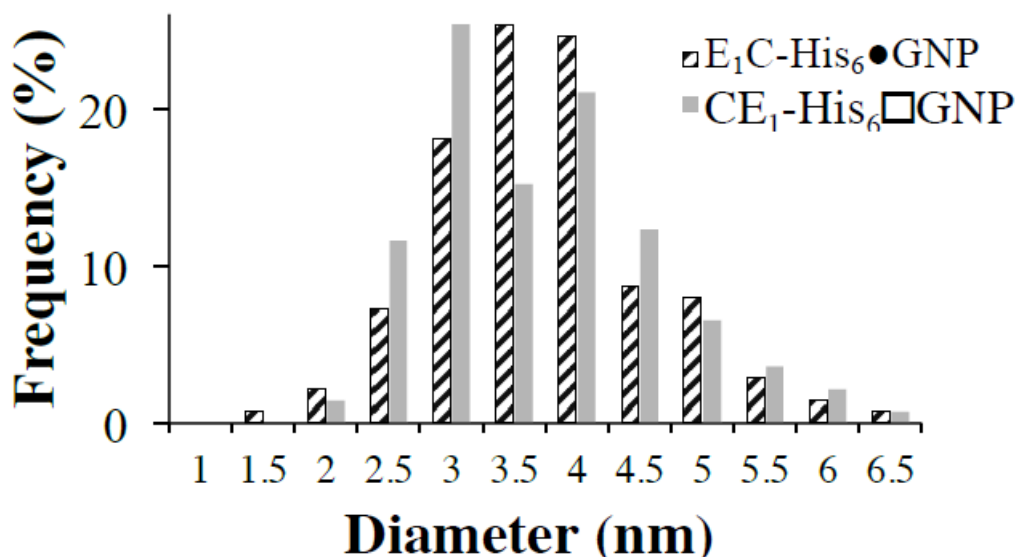

**Figure S6:** Size distribution of GNPs in each protein constructs. More than 130 particles were analyzed for both constructs. The average diameter of GNPs in E<sub>1</sub>C-His<sub>6</sub>-GNP is  $3.5 \pm 0.9$  nm and  $3.4 \pm 0.9$  nm in CE<sub>1</sub>-His<sub>6</sub>-GNP.

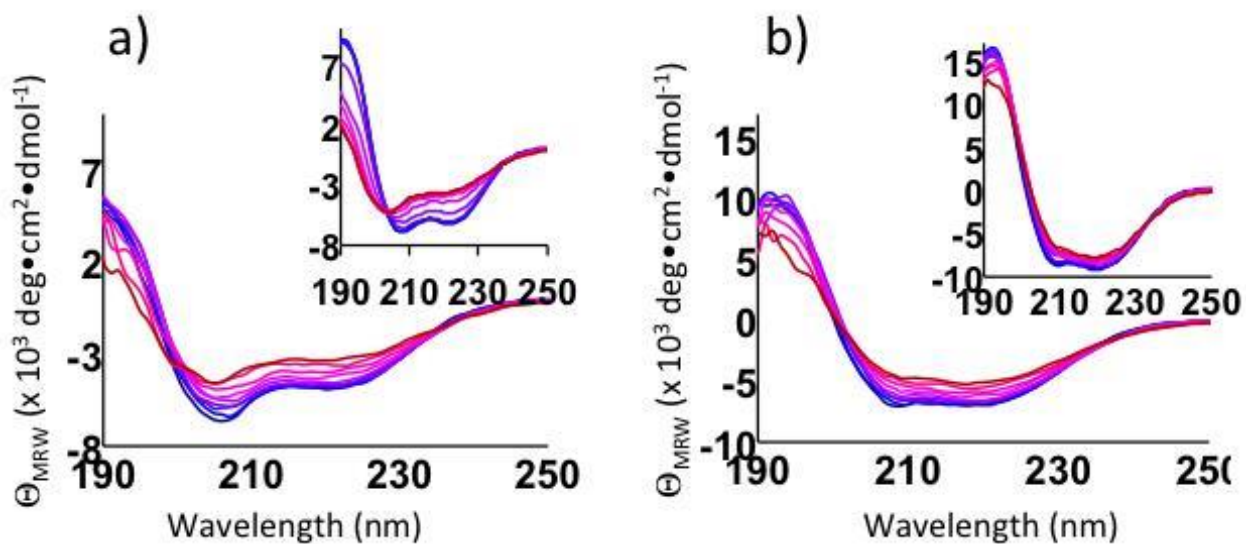

**Figure S7:** Temperature dependent wavelength scans of (a) CE<sub>1</sub>-His<sub>6</sub>-GNP and (b) E<sub>1</sub>C-His<sub>6</sub>-GNP from 20°C to 95°C. Insets represent the temperature-dependent wavelength scans of the same protein in the absence of GNP templated-synthesis.

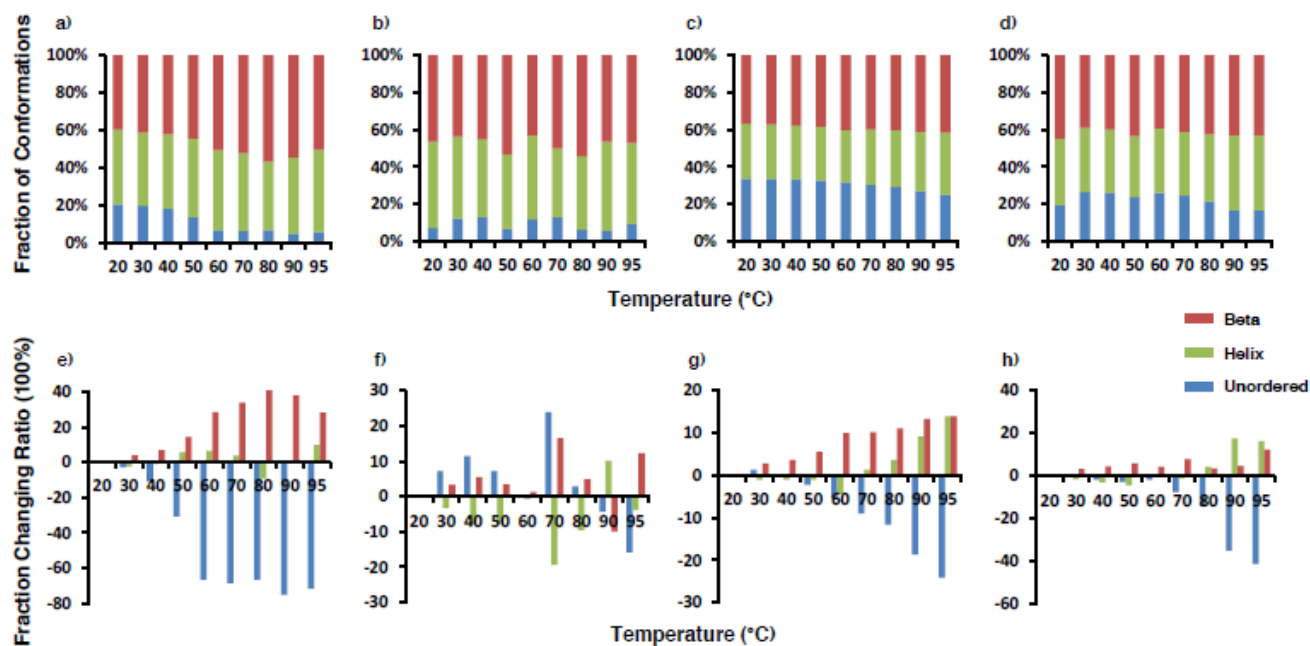

**Figure S8:** Secondary structure calculation using CDSSTR of (a) CE<sub>1</sub>-His<sub>6</sub>, (b) CE<sub>1</sub>-His<sub>6</sub>-GNP, (c) E<sub>1</sub>C-His<sub>6</sub> and (d) E<sub>1</sub>C-His<sub>6</sub>-GNP at pH 8.0. The fraction of secondary structure ratios as a function of temperature for (e) CE<sub>1</sub>-His<sub>6</sub>, (f) CE<sub>1</sub>-His<sub>6</sub>-GNP, (g) E<sub>1</sub>C-His<sub>6</sub> and (h) E<sub>1</sub>C-His<sub>6</sub>-GNP via CDSSTR.

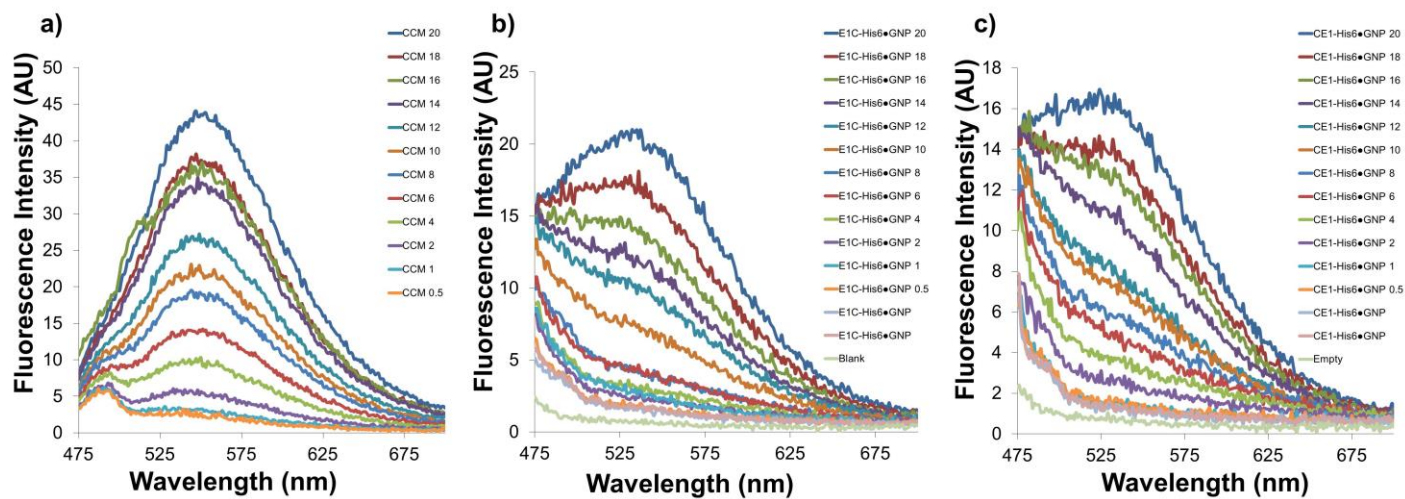

**Figure S9:** Fluorescence, Ex: 420 nm; optical cutoff: 455 nm, of (a) CCM, (b) E<sub>1</sub>C-His<sub>6</sub>-GNP and (c) CE<sub>1</sub>-His<sub>6</sub>-GNP. Values following each data point represent the micromolar concentration of CCM.

|                          | <b>CE<sub>1</sub>-His<sub>6</sub></b> | <b>CE<sub>1</sub>-His<sub>6</sub>•GNP</b> | <b>E<sub>1</sub>C-His<sub>6</sub></b> | <b>E<sub>1</sub>C-His<sub>6</sub>•GNP</b> |
|--------------------------|---------------------------------------|-------------------------------------------|---------------------------------------|-------------------------------------------|
| Concentration of protein | 0.1621 mg/mL                          | 0.1621 mg/mL                              | 0.1818 mg/mL                          | 0.1818 mg/mL                              |
| Concentration of NaCl    | 0.946 M                               | 0.946 M                                   | 0.45 M                                | 0.45 M                                    |

**Table S1.** Final concentration of protein and NaCl in samples for T<sub>i</sub> measurement

|                  | <b>CE<sub>1</sub>-His<sub>6</sub></b> | <b>CE<sub>1</sub>-His<sub>6</sub>•GNP</b> | <b>CE<sub>1</sub>-His<sub>6</sub>-CCM1<sup>a</sup></b> | <b>CE<sub>1</sub>-His<sub>6</sub>-GNP-CCM2<sup>a</sup></b> | <b>CCM2<sup>b</sup></b> |
|------------------|---------------------------------------|-------------------------------------------|--------------------------------------------------------|------------------------------------------------------------|-------------------------|
| Conc. of protein | 10                                    | 10                                        | 10                                                     | 10                                                         | N/A                     |
| Conc. of CCM     | N/A                                   | N/A                                       | 4.27                                                   | 46.32                                                      | 46.32                   |
|                  | <b>E<sub>1</sub>C-His<sub>6</sub></b> | <b>E<sub>1</sub>C-His<sub>6</sub>-GNP</b> | <b>E<sub>1</sub>C-His<sub>6</sub>-CCM3<sup>a</sup></b> | <b>E<sub>1</sub>C-His<sub>6</sub>-GNP-CCM4<sup>a</sup></b> | <b>CCM4<sup>b</sup></b> |
| Conc. of protein | 10                                    | 10                                        | 10                                                     | 10                                                         | N/A                     |
| Conc. of CCM     | N/A                                   | N/A                                       | 1.58                                                   | 40.1                                                       | 40.1                    |

<sup>a</sup>CCM added in uptake experiment are equivalent to the loading capacities of each protein sample

<sup>b</sup>For CCM controls, the amount equivalent to P-GNP loading capacities was used

**Table S2:** Final concentration (μM) of each component in samples for cell uptake experiment.

|      | <b>CE<sub>1</sub>-His<sub>6</sub></b> | <b>CE<sub>1</sub>-His<sub>6</sub>-GNP</b> | <b>CE<sub>1</sub>-His<sub>6</sub>-CCM1</b> | <b>CE<sub>1</sub>-His<sub>6</sub>-GNP -CCM2</b> | <b>CCM1</b>  | <b>CCM2</b>  | <b>Cell only</b> |
|------|---------------------------------------|-------------------------------------------|--------------------------------------------|-------------------------------------------------|--------------|--------------|------------------|
| Abs. | 2.07 ± 0.01                           | 2.028 ± 0.01                              | 2.046 ± 0.01                               | 2.046 ± 0.01                                    | 1.999 ± 0.05 | 2.025 ± 0.02 | 2.045 ± 0.01     |
|      | <b>E<sub>1</sub>C-His<sub>6</sub></b> | <b>E<sub>1</sub>C-His<sub>6</sub>-GNP</b> | <b>E<sub>1</sub>C-His<sub>6</sub>-CCM1</b> | <b>E<sub>1</sub>C-His<sub>6</sub>-GNP -CCM2</b> | <b>CCM1</b>  | <b>CCM2</b>  | <b>DMEM</b>      |
| Abs. | 2.053 ± 0.00                          | 2.042 ± 0.02                              | 2.034 ± 0.02                               | 2.042 ± 0.01                                    | 2.039 ± 0.00 | 2.044 ± 0.01 | 0.00 ± 0.00      |

**Table S3:** MTS Assay after 4 Hour Treatment.

|      | <b>CE<sub>1</sub>-His<sub>6</sub></b> | <b>CE<sub>1</sub>-His<sub>6</sub>-GNP</b> | <b>CE<sub>1</sub>-His<sub>6</sub>-CCM1</b> | <b>CE<sub>1</sub>-His<sub>6</sub>-GNP -CCM2</b> | <b>CCM1</b>  | <b>CCM2</b>  | <b>Cell only</b> |
|------|---------------------------------------|-------------------------------------------|--------------------------------------------|-------------------------------------------------|--------------|--------------|------------------|
| Abs. | 2.138 ± 0.01                          | 2.051 ± 0.01                              | 2.041 ± 0.00                               | 2.026 ± 0.03                                    | 2.034 ± 0.02 | 1.999 ± 0.01 | 2.017 ± 0.05     |
|      | <b>E<sub>1</sub>C-His<sub>6</sub></b> | <b>E<sub>1</sub>C-His<sub>6</sub>-GNP</b> | <b>E<sub>1</sub>C-His<sub>6</sub>-CCM1</b> | <b>E<sub>1</sub>C-His<sub>6</sub>-GNP -CCM2</b> | <b>CCM1</b>  | <b>CCM2</b>  | <b>DMEM</b>      |
| Abs. | 2.119 ± 0.00                          | 1.999 ± 0.02                              | 2.034 ± 0.00                               | 1.866 ± 0.15                                    | 1.974 ± 0.01 | 1.98 ± 0.04  | 0.00 ± 0.00      |

**Table S4:** MTS Assay after 24 Hour Treatment.
